# Supplementary material
Source: ML conference proceedings conference paper supplement (https://proceedings.neurips.cc/paper_files/paper/2011/hash/f3f1b7fc5a8779a9e618e1f23a7b7860-Abstract.html)
Supplement: Supplementary file 2 [file f3f1b7fc5a8779a9e618e1f23a7b7860-Supplemental.zip]

Archive with 1 entries (1 files):
- all/Paper 1316/nips11contextual-supplemental2.pdf
